# Supplementary material for: Controllable construction of graphitic carbon nitride with highly-ordered macropores for boosting photodegradation
Source: Royal Society of Chemistry journal article supplement (doi:10.1039/d3gc02604c), 2023-01-01
Supplement: d3gc02604c1.pdf [file d3gc02604c1.pdf]

## Supplementary Information

### **Controllable Construction of Graphitic Carbon Nitride with Highly Ordered Macropores for Boosting Photodegradation**

Ruxia Li<sup>a</sup>, Xiaoxiang Fan<sup>a</sup>, Jianqi Meng<sup>a</sup>, Jie Wu<sup>a</sup>, Jinjuan Zhao<sup>a</sup>, Ruifa Jin<sup>b</sup>, Honglei

Yang<sup>a\*</sup> and Shuwen Li<sup>a\*</sup>

<sup>a</sup> State Key Laboratory of Applied Organic Chemistry, Gansu Provincial Engineering Laboratory for Chemical Catalysis, College of Chemistry and Chemical Engineering, Lanzhou University, Lanzhou, 730000, P. R. China

<sup>b</sup> Inner Mongolia Key Laboratory of Photoelectric Functional Materials, College of Chemistry and Life Sciences, Chifeng University, Chifeng, 024000, P. R. China

\*Corresponding authors.

E-mail: yanghl@lzu.edu.cn (Honglei Yang), lishw@lzu.edu.cn (Shuwen Li)

Address: Tianshui South Road 222, Lanzhou 730000, P. R. China.

Supplementary Information consists of 4 pages, including this page.

Contents: 3 Figures and 2 Tables.

## 1. CFD simulations

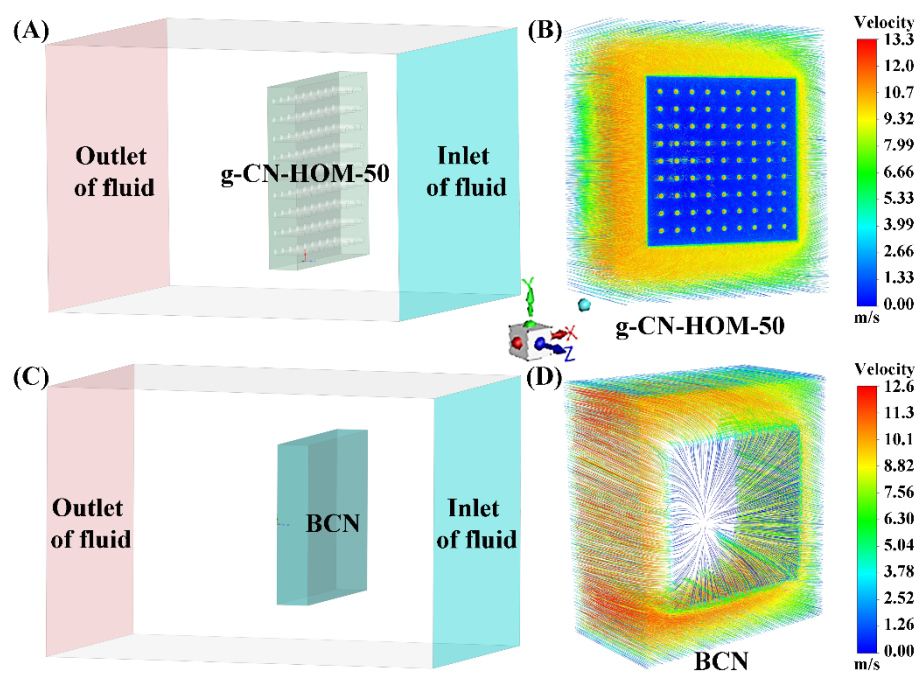

**Fig. S1.** CFD model (A) and the path lines image of velocity (B) in g-CN-HOM-50.

CFD model (C) and the path lines image of velocity (D) in BCN

**2. SEM images of BCN, g-CN-HOM-25 and g-CN-HOM-75, STEM-HAADF images and the corresponding EDS mapping images of g-CN-HOM-50 and BCN**

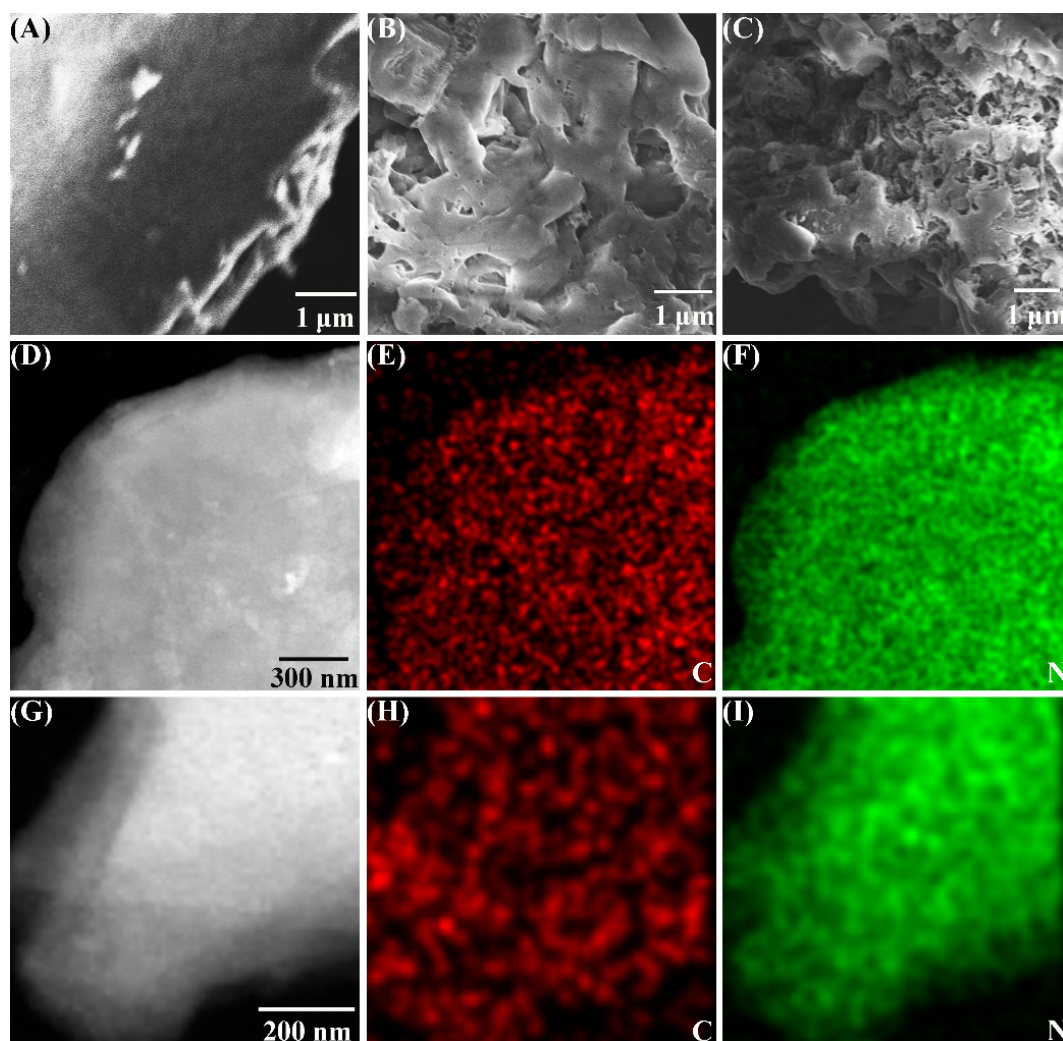

**Fig. S2.** SEM images of BCN (A), g-CN-HOM-25 (B) and g-CN-HOM-75 (C). The STEM-HAADF image (D) and the corresponding EDS mapping images (E, F) of g-CN-HOM-50. The STEM-HAADF image (G) and the corresponding EDS mapping images (H, I) of BCN.

### 3. Elemental analysis of g-CN-HOM-50 and BCN

**Table S1** Elemental analysis of g-CN-HOM-50 and BCN.

| Catalysts   | C Content (wt%) | N Content (wt%) | C : N    |
|-------------|-----------------|-----------------|----------|
| g-CN-HOM-50 | 33.69           | 54.68           | 3 : 4.18 |
| BCN         | 34.07           | 56.02           | 3 : 4.23 |

### 4. N<sub>2</sub> adsorption-desorption isotherms and pore size distribution of g-CN-HOM-25 and g-CN-HOM-75

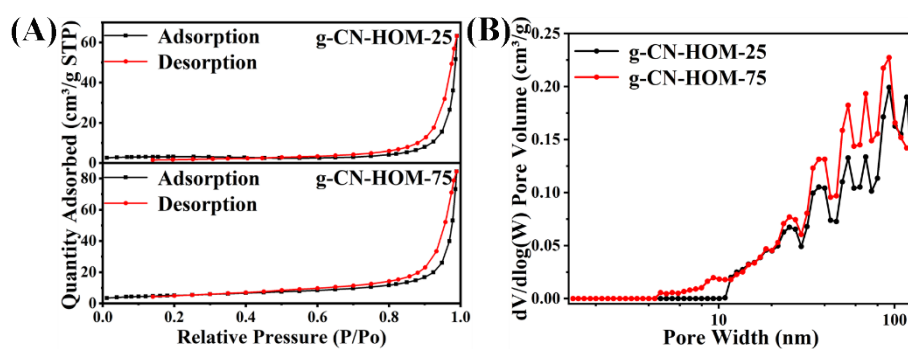

**Fig. S3.** N<sub>2</sub> adsorption-desorption isotherms (A) and pore size distribution (B) of g-CN-HOM-25 and g-CN-HOM-75.

### 5. The BET specific surface area (SSA) of catalysts

**Table S2** The BET SSA of catalysts.

| Catalysts                                    | g-CN-HOM-25 | g-CN-HOM-50 | g-CN-HOM-75 | BCN  |
|----------------------------------------------|-------------|-------------|-------------|------|
| BET SSA<br>(m <sup>2</sup> g <sup>-1</sup> ) | 10.02       | 20.66       | 18.24       | 8.35 |
